# Supplementary material for: The Association Between Cardiometabolic Index and Hypertension in Diabetic Individuals Aged 45 and Above: Evidence from Two National Databases
Source: Research Square preprint supplement (doi:10.21203/rs.3.rs-7537879/v1), 2025-10-12
Supplement: Supplementary file 1 [file 76cfb947fd8641db8a7296aa.pdf]

In NHANES:

1. Smoking status: These next questions are about cigarette smoking and other tobacco use. {Have you/Has SP} smoked at least 100 cigarettes in {your/his/her} entire life?
2. Alcohol consumption patterns: The next questions are about drinking alcoholic beverages. Included are liquor (such as whiskey or gin), beer, wine, wine coolers, and any other type of alcoholic beverage. In any one year, {have you/has SP} had at least 12 drinks of any type of alcoholic beverage? By a drink, I mean a 12 oz. beer, a 5 oz. glass of wine, or one and half ounces of liquor.
3. CVD: 1. Has a doctor or other health professional ever told {you/SP} that {you/s/he} . . . had congestive heart failure? 2. Has a doctor or other health professional ever told {you/SP} that {you/s/he} . . . had coronary heart disease? 3. Has a doctor or other health professional ever told {you/SP} that {you/s/he} . . . had angina, also called angina pectoris? 4. Has a doctor or other health professional ever told {you/SP} that {you/s/he} . . . had a heart attack (also called myocardial infarction)? 5. Has a doctor or other health professional ever told {you/SP} that {you/s/he} . . . had a stroke?

In CHARLS:

4. CVD: Has a doctor ever told [XRName] that they have [XChroDisType[i]]?  
Answer: YES or NO

Note: XRName: Name of Respondent Name of Respondent. XChroDisType[i]:  
Chronic Disease Categories: Heart disease (such as myocardial infarction, coronary heart disease, angina pectoris, congestive heart failure, and other cardiac conditions), Stroke.

5. Smoking status: Have you ever smoked? (Including cigarettes, pipe tobacco, smoking with a pipe, or chewing tobacco) Answer: YES or NO
6. Alcohol consumption patterns: In the past year, have [XRName] consumed alcoholic beverages, including beer, wine, rice wine, yellow wine or baijiu, medicinal wine, etc.? How often did you drink? Answer: 1. Drink alcohol more than once a month  
2. Drink alcohol less than once a month 3. Do not drink alcohol at all

We consider 1 and 2 to be drinking.
